## RETRACTION

# Retraction: Evaluation of Pakistani wheat germplasm for leaf rust resistance at various locations

The *PLOS ONE* Editors

The *PLOS ONE* Editors retract this article [1] because it was identified as one of a series of submissions for which we have concerns about authorship, competing interests, and peer review. We regret that the issues were not addressed prior to the article's publication.

AEA, AFG, AMUD, AQ, AUR, BHE, JA, JI, KAI, NA, MIT, MJ, SAjmal, SAsghar, SB, SF, and SG did not agree with the retraction. AA either did not respond directly or could not be reached.

## Reference

1. Asghar S, Rehman AU, Ahmad N, Ajmal S, Ahsan A, Gulnaz S, et al. (2022) Evaluation of Pakistani wheat germplasm for leaf rust resistance at various locations. *PLoS ONE* 17(5): e0266695. <https://doi.org/10.1371/journal.pone.0266695> PMID: 35507582

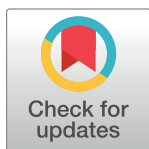

## OPEN ACCESS

**Citation:** The *PLOS ONE* Editors (2022) Retraction: Evaluation of Pakistani wheat germplasm for leaf rust resistance at various locations. *PLoS ONE* 17(8): e0272494. <https://doi.org/10.1371/journal.pone.0272494>

**Published:** August 17, 2022

**Copyright:** © 2022 The *PLOS ONE* Editors. This is an open access article distributed under the terms of the [Creative Commons Attribution License](https://creativecommons.org/licenses/by/4.0/), which permits unrestricted use, distribution, and reproduction in any medium, provided the original author and source are credited.
